# Supplementary material for: Optimizing the prepared condition of TiO2 1D/3D network structure films to enhance the efficiency of dye-sensitized solar cells
Source: Royal Society of Chemistry journal article supplement (doi:10.1039/c5ra16458c), 2015-01-01
Supplement: c5ra16458c1.pdf [file c5ra16458c1.pdf]

# Optimizing the Prepared Condition of TiO<sub>2</sub> 1D/3D Network Structure Films to Enhance the Efficiency of Dye-Sensitized Solar Cells

Baoyuan Wang, Jingshu Wan, Jun Zhang, Hao Wang\*

Hubei Collaborative Innovation Center for Advanced Organic Chemical Materials, Faculty of  
Physics and Electronic Science, Hubei key laboratory of ferroelectric and dielectric  
materials and devices, Hubei University, Wuhan 430062, PR China

\*corresponding author: Hao Wang; Telephone: +86027-88662550; Fax number : +86027-

88663390; Email: [nanoguy@126.com](mailto:nanoguy@126.com);

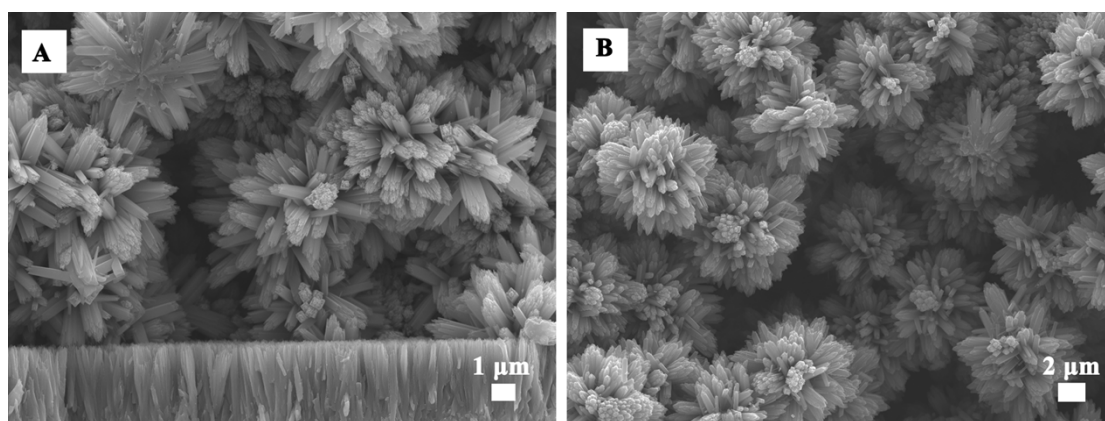

**Figure 1s** the FE-SEM images of TiO<sub>2</sub> 1D/3D nanorods

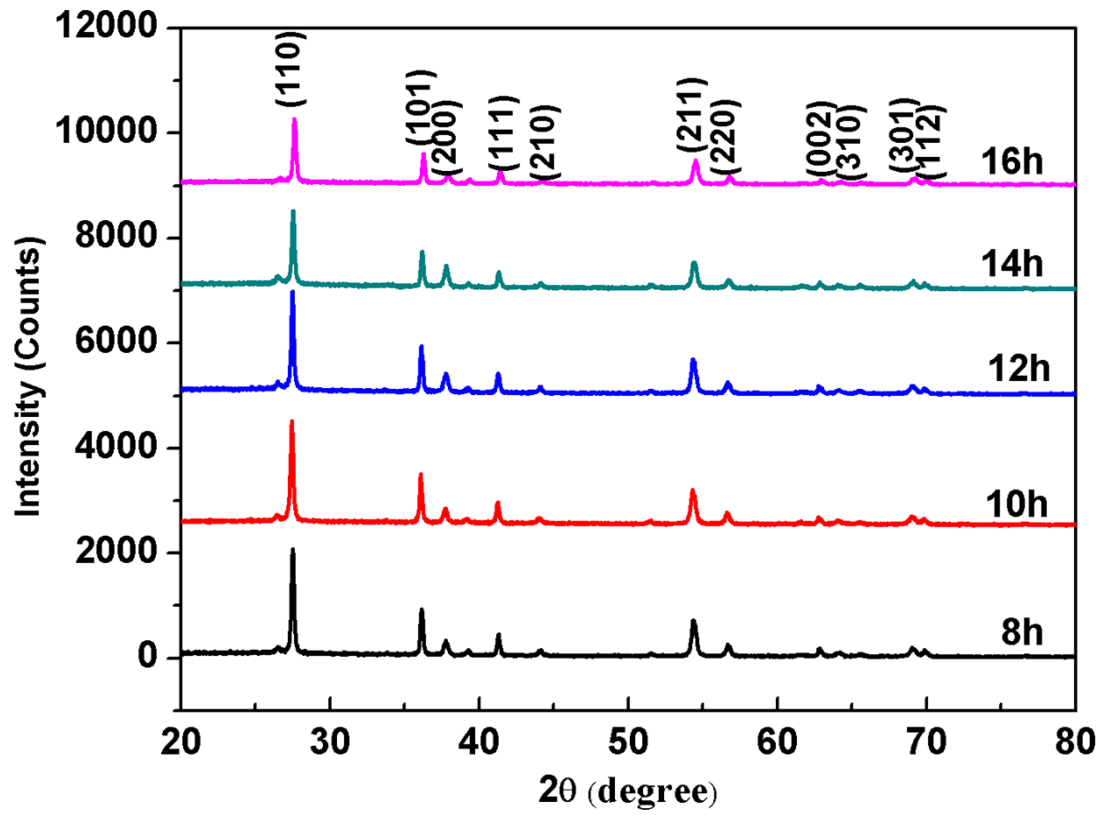

Figure 2s the X-ray diffraction pattern of TiO<sub>2</sub> network structure films etched for different times.

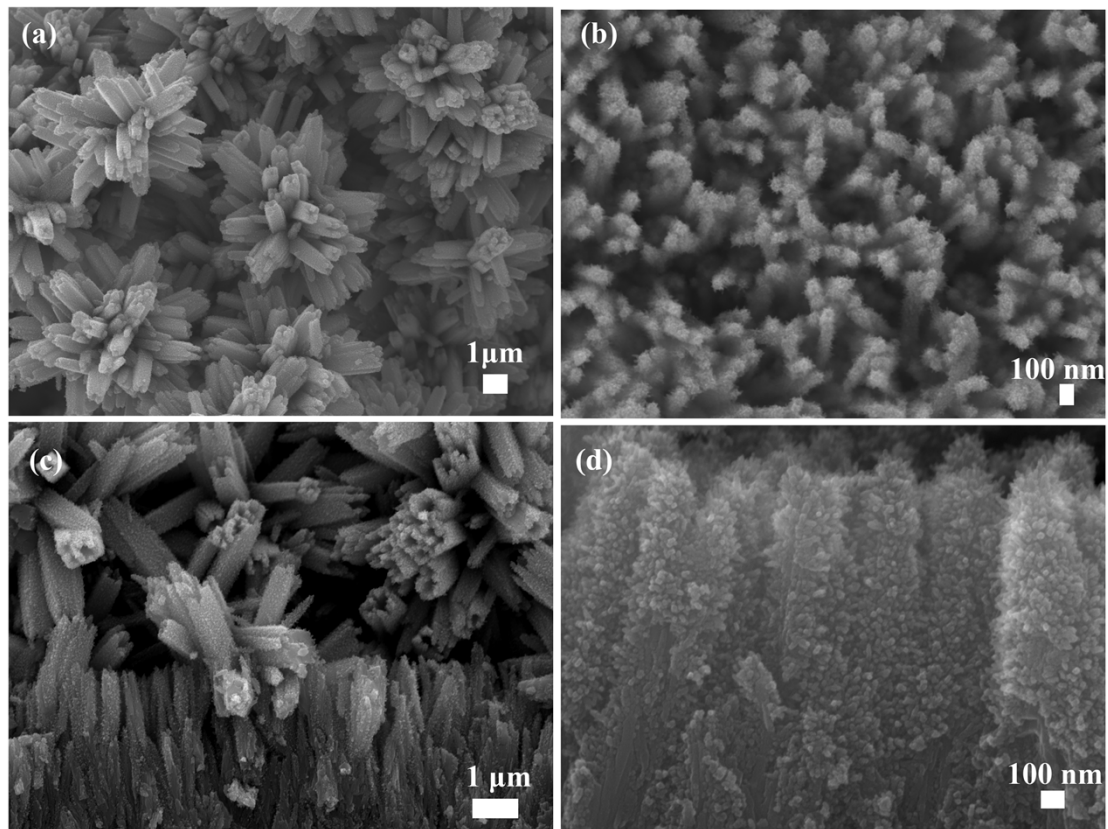

**Figure 3s** the top (a) and cross-sectional (c) views of TiO<sub>2</sub> network structures treated with TiCl<sub>4</sub> for 48 h. The corresponding plan (b) and cross-sectional (d) SEM of TiO<sub>2</sub> nanowire arrays on the bottom layer.
